# Supplementary material for: Application of design of experiments (DoE) optimization to the one-pot synthesis of 4,6-dihydropteridinones
Source: Royal Society of Chemistry journal article supplement (doi:10.1039/c5ob01154j), 2015-01-01

# Application of Design of Experiments (DoE) Optimization to the Synthesis of 4,6-Dihydropteridinones

*Steven Stone, Tiansheng Wang, Jianglin Liang, John Cochran, Jeremy Green and Wenxin Gu\**

Vertex Pharmaceuticals Inc., 50 Northern Avenue, Boston, MA 02210

## **Supporting Information**

## Copies of Spectra and Chromatograms

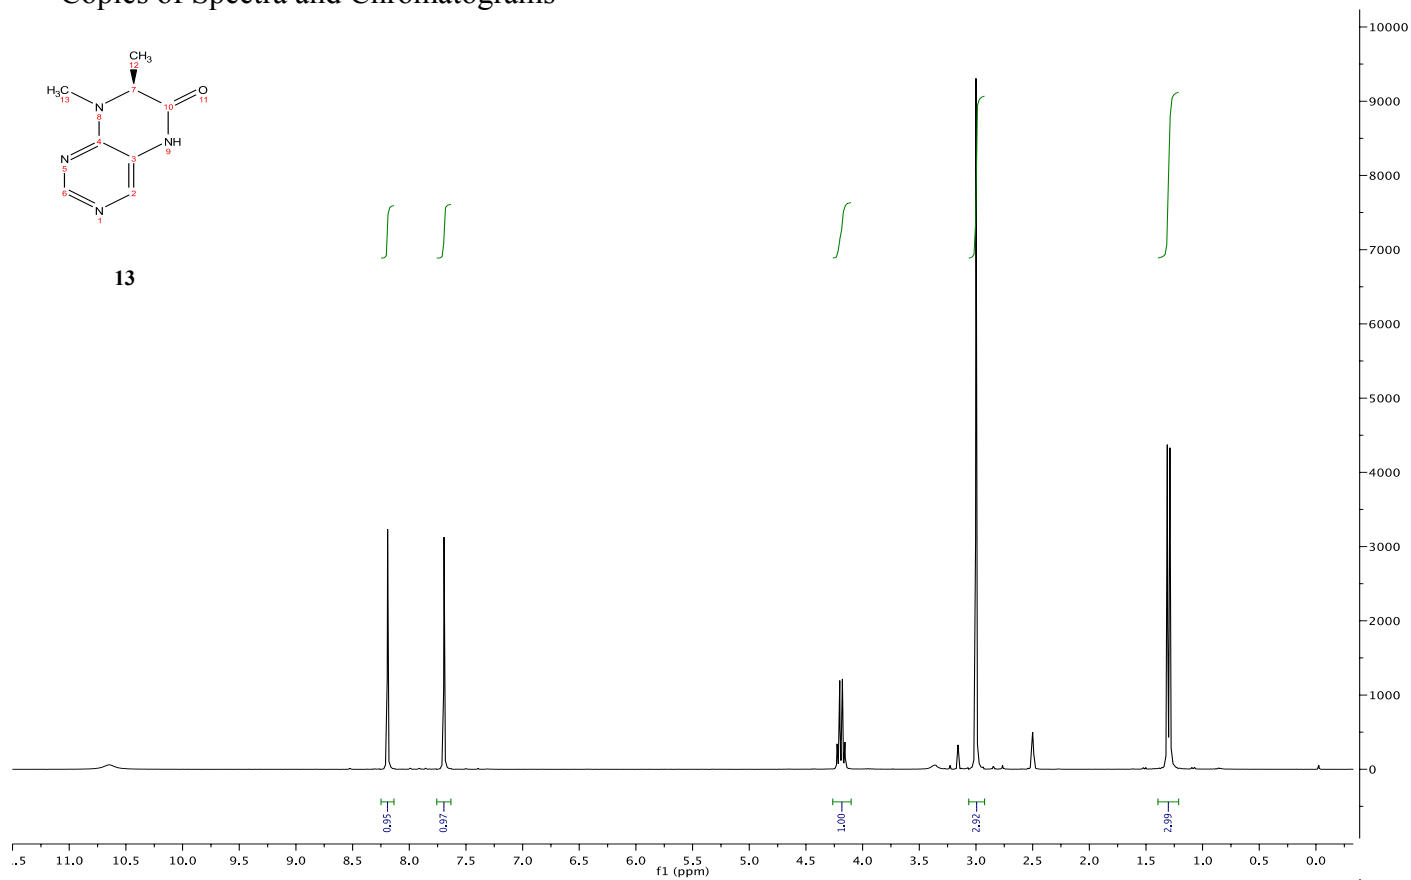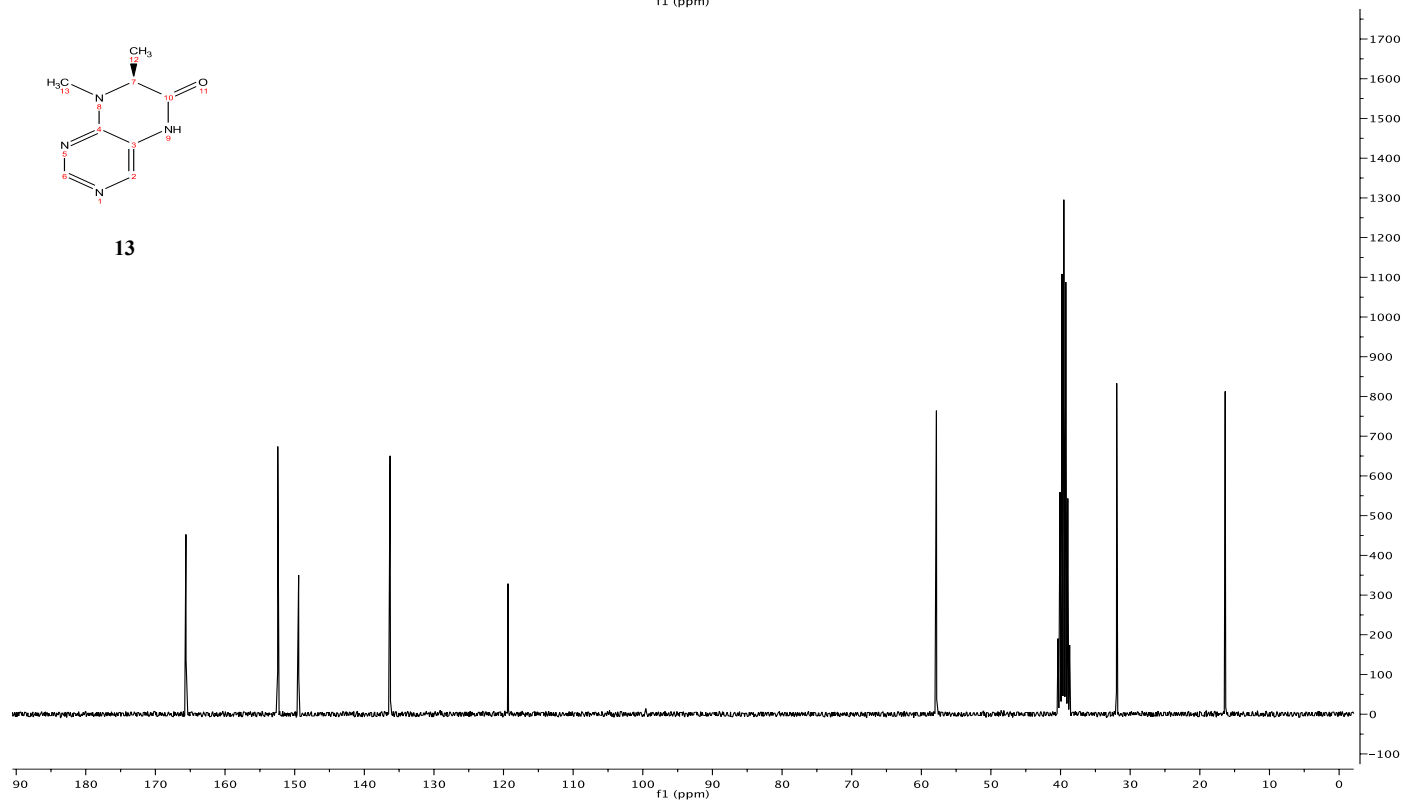

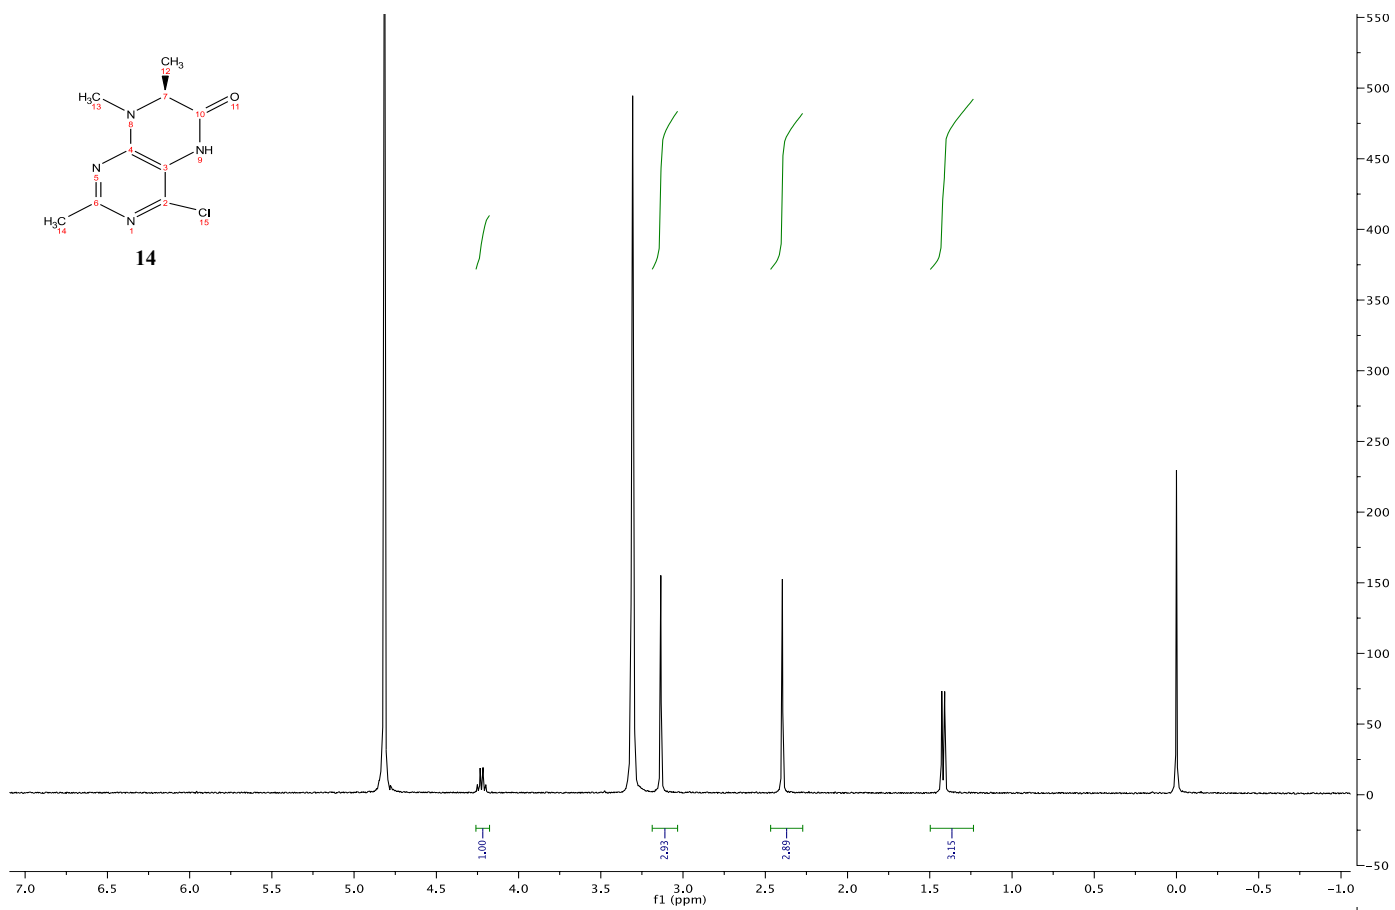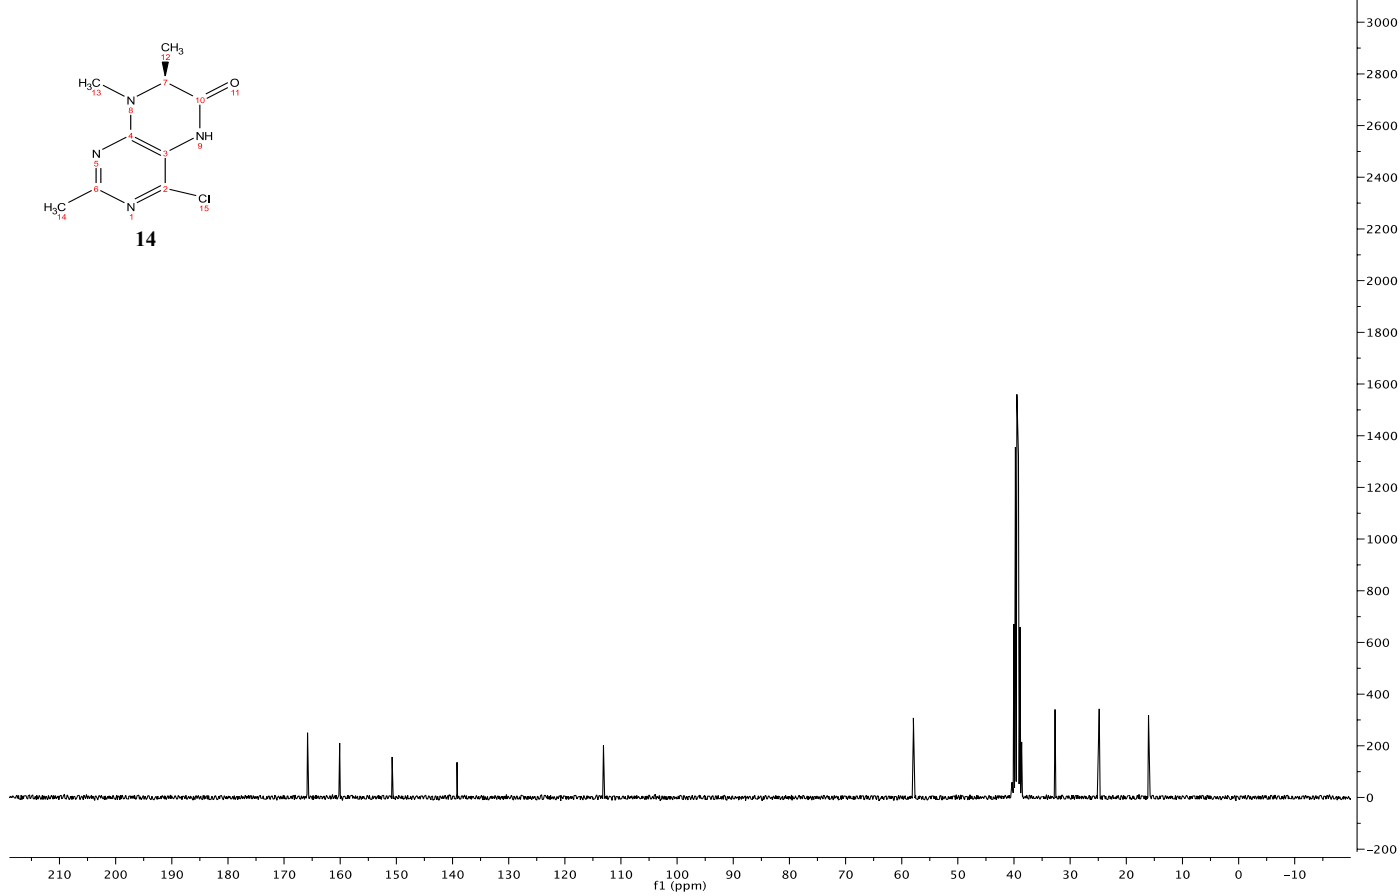

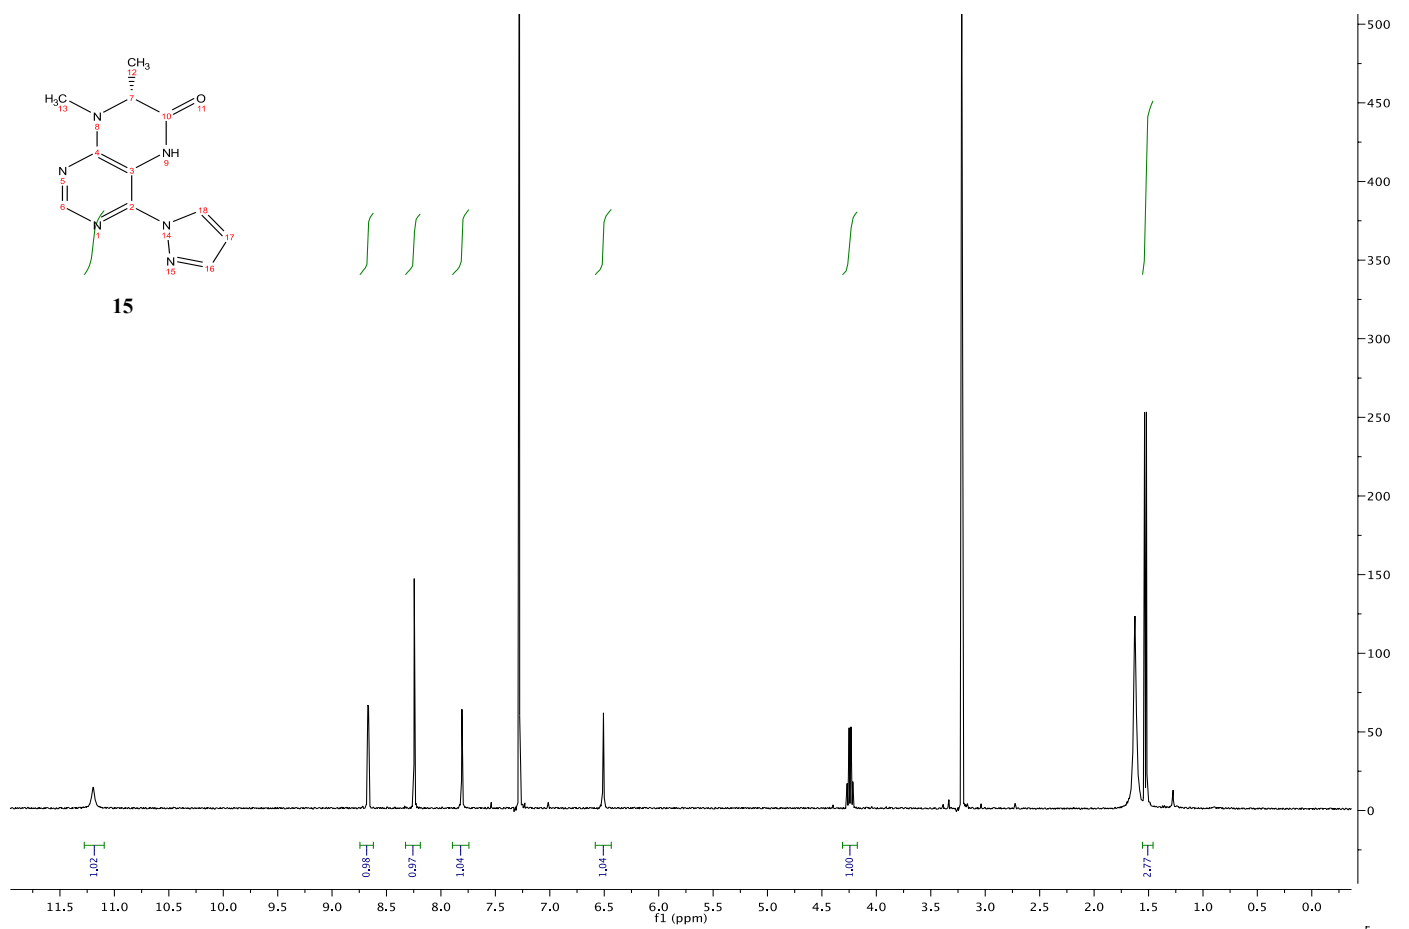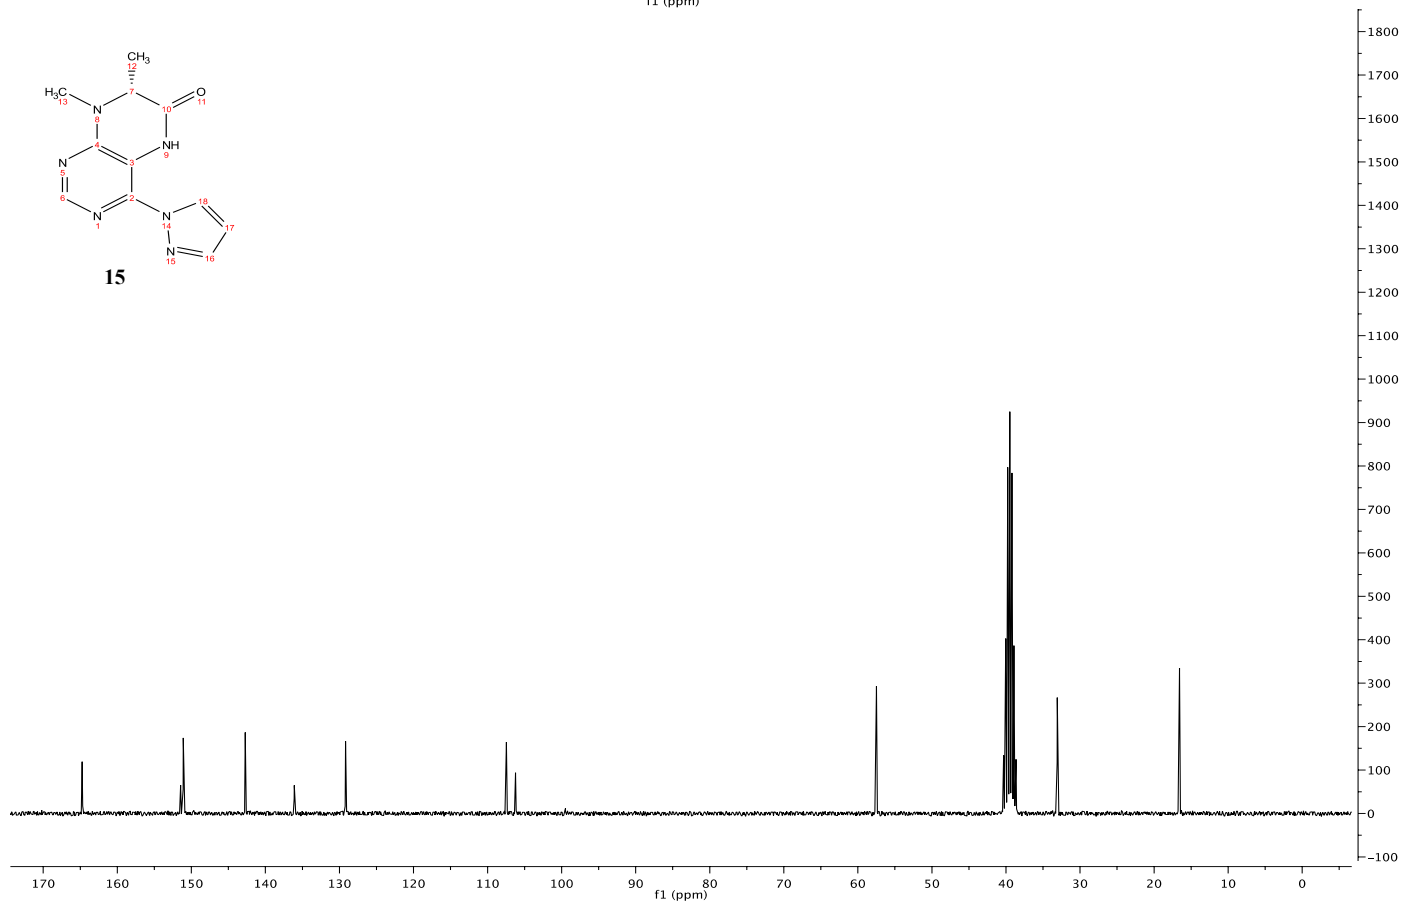

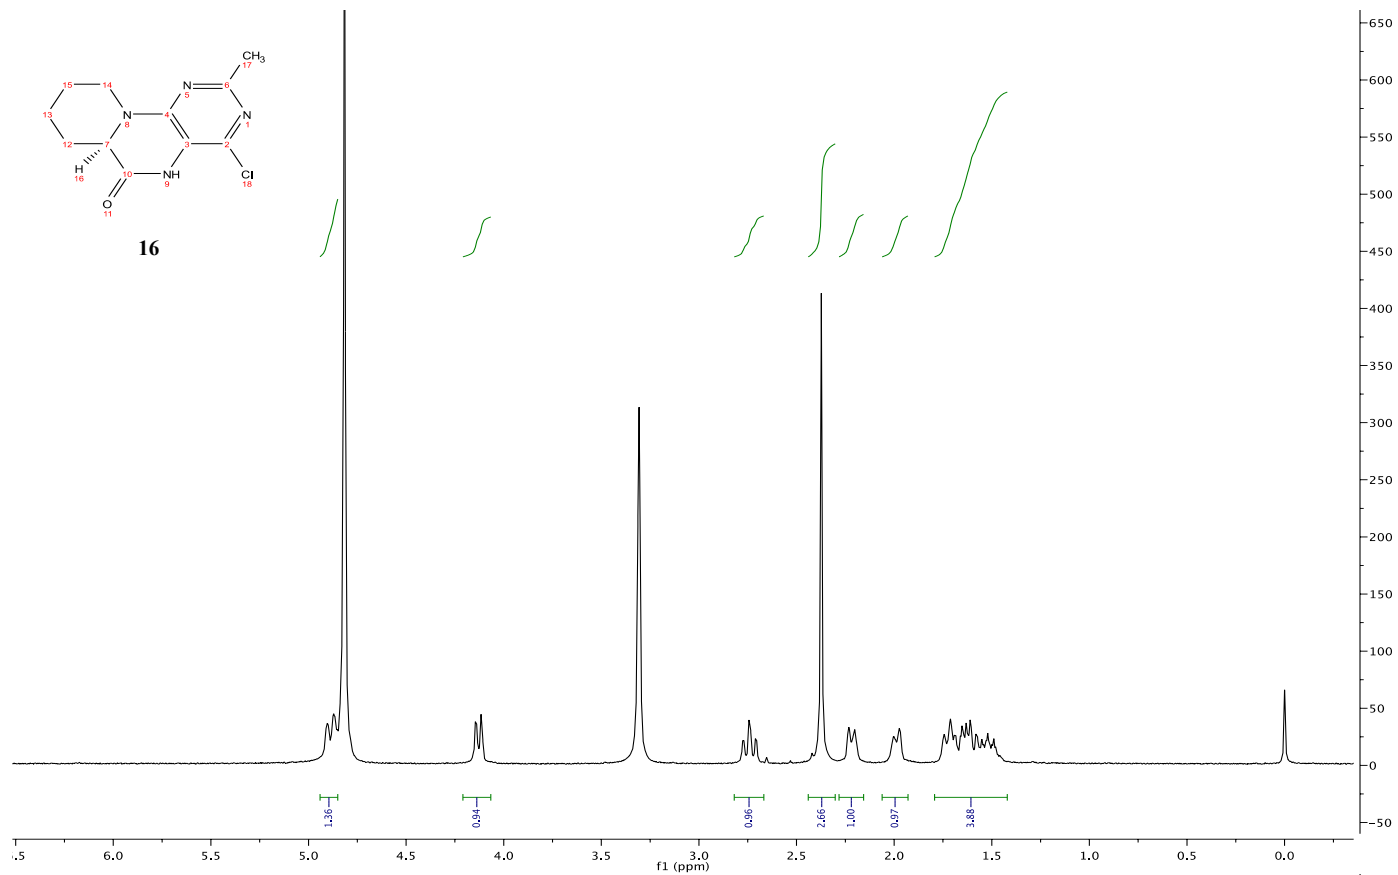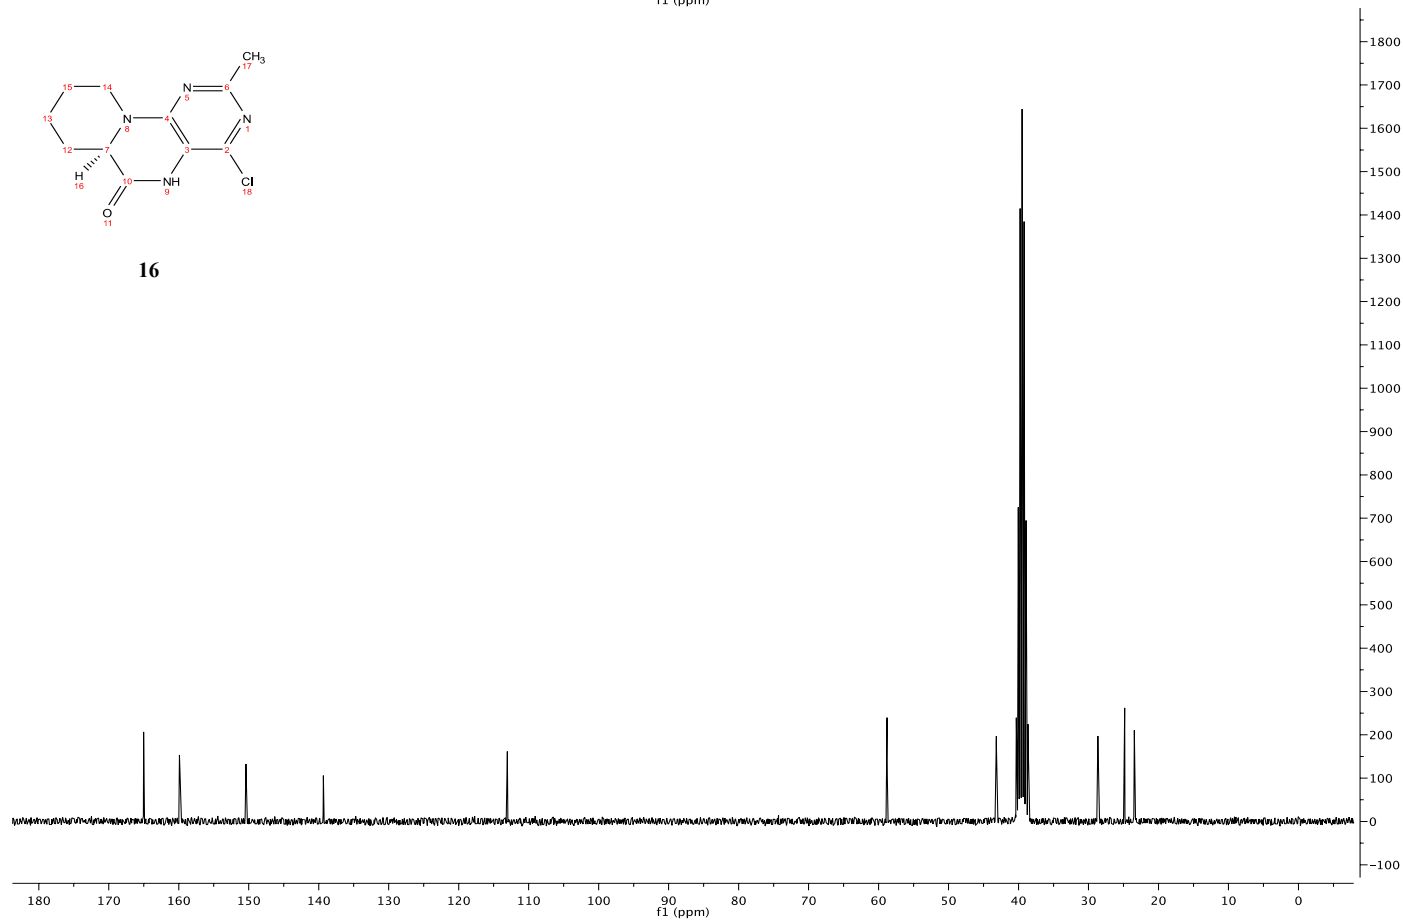

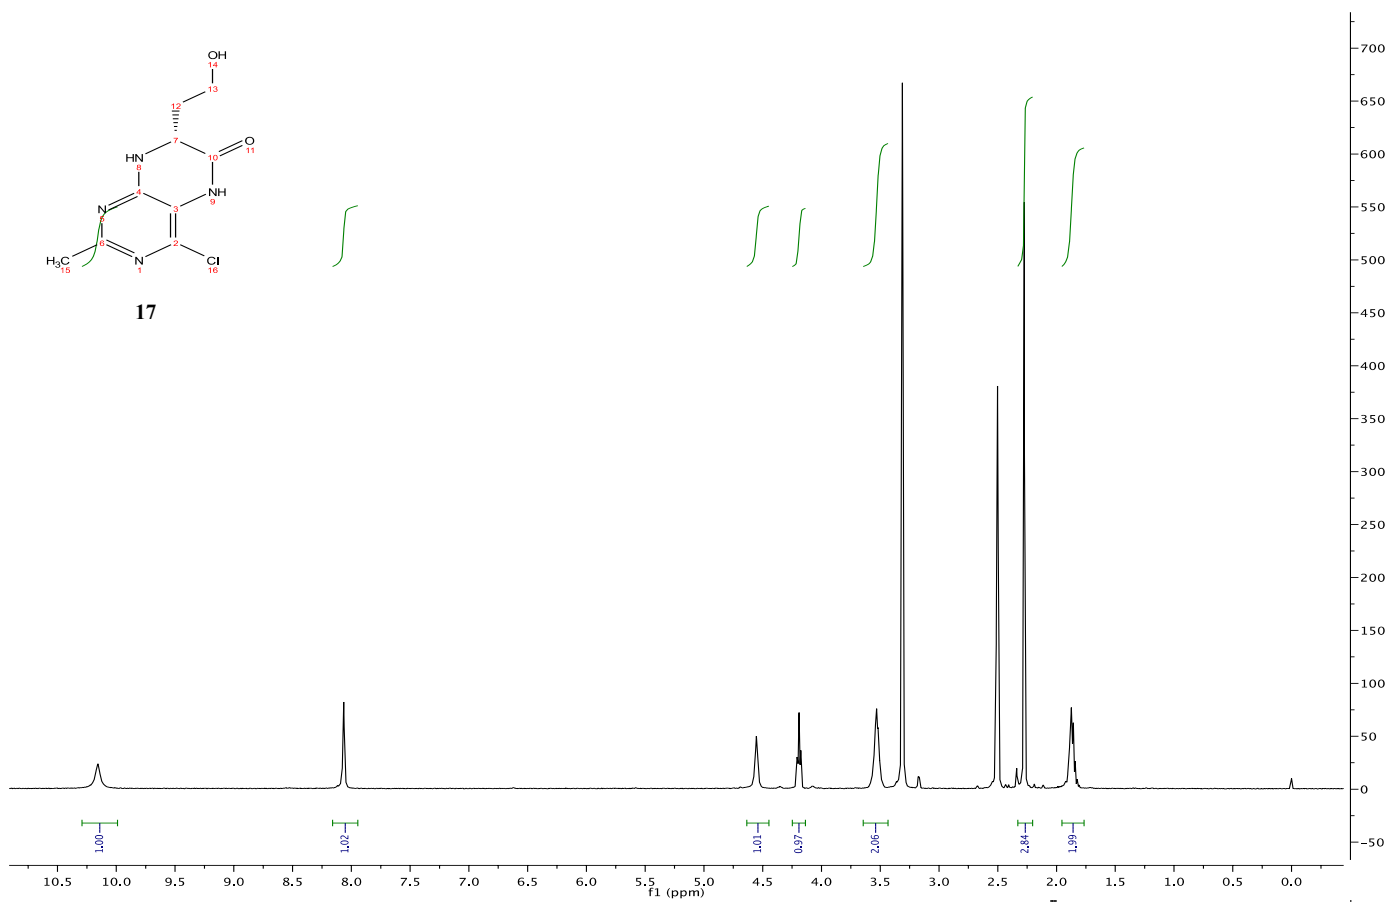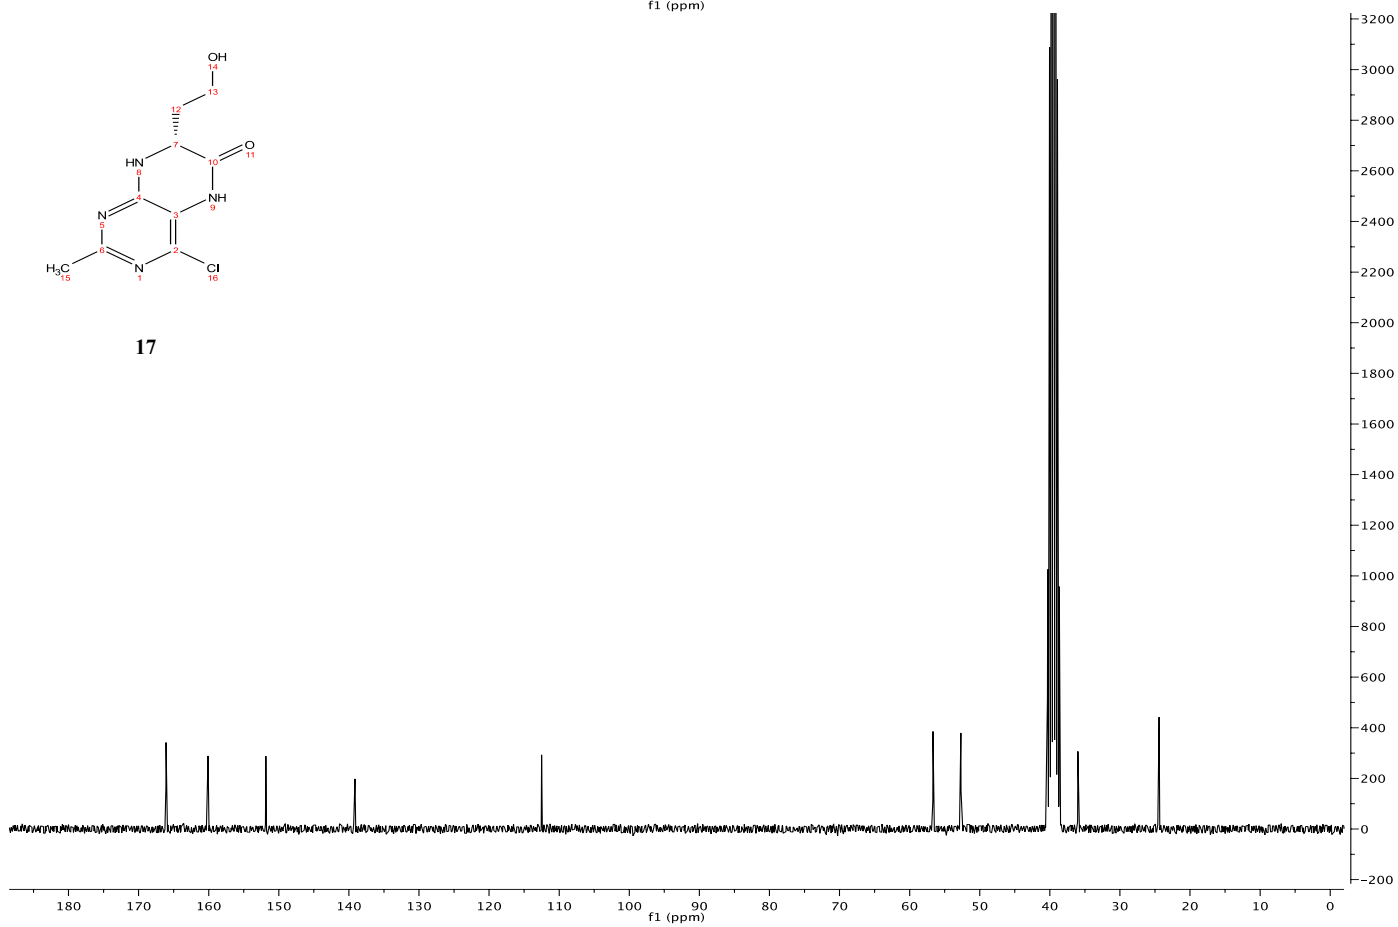

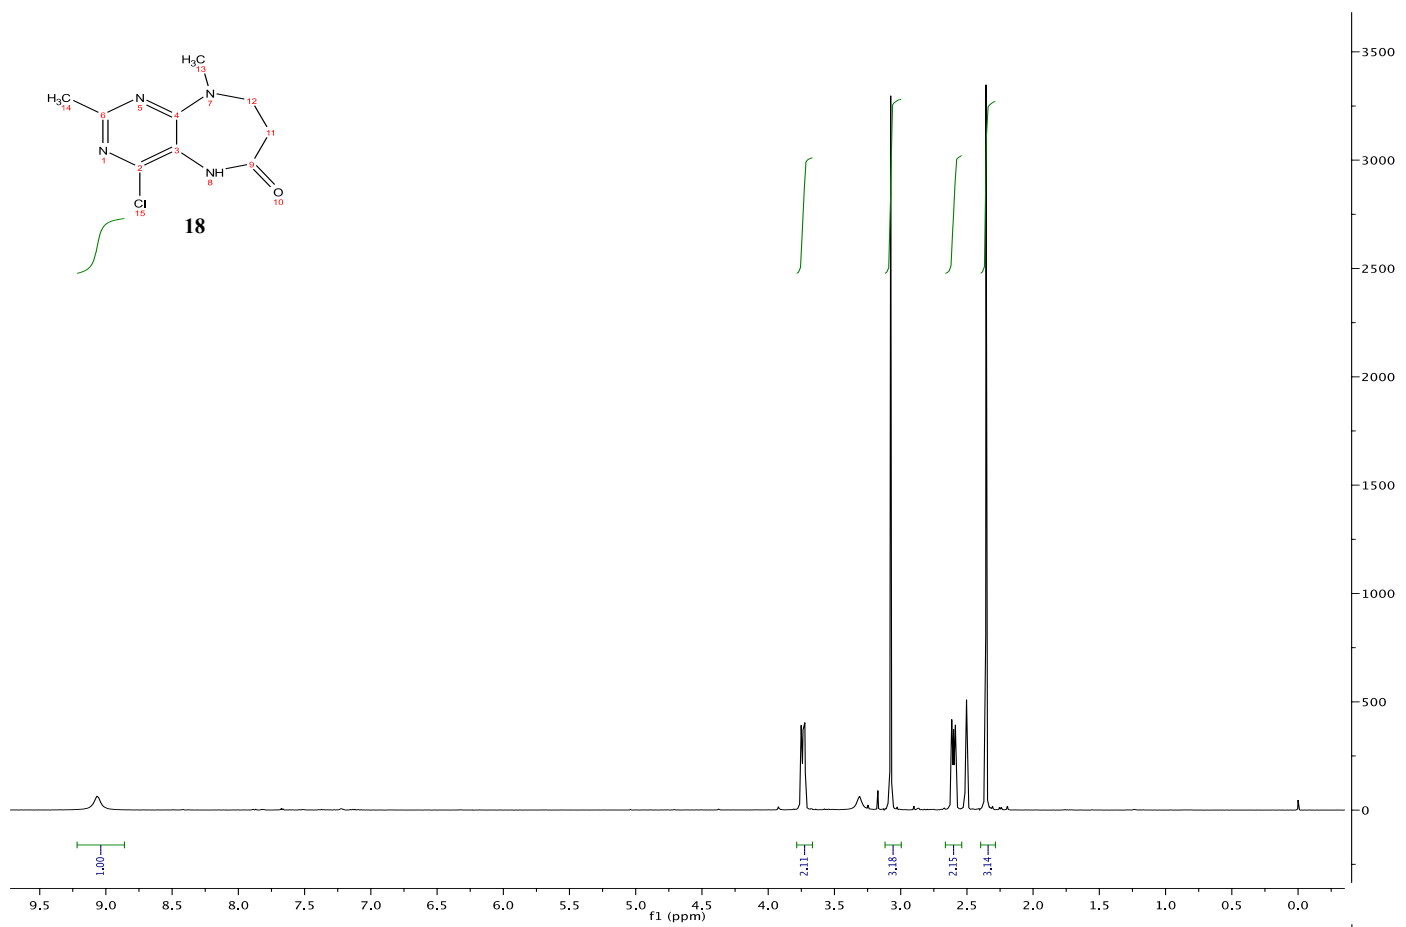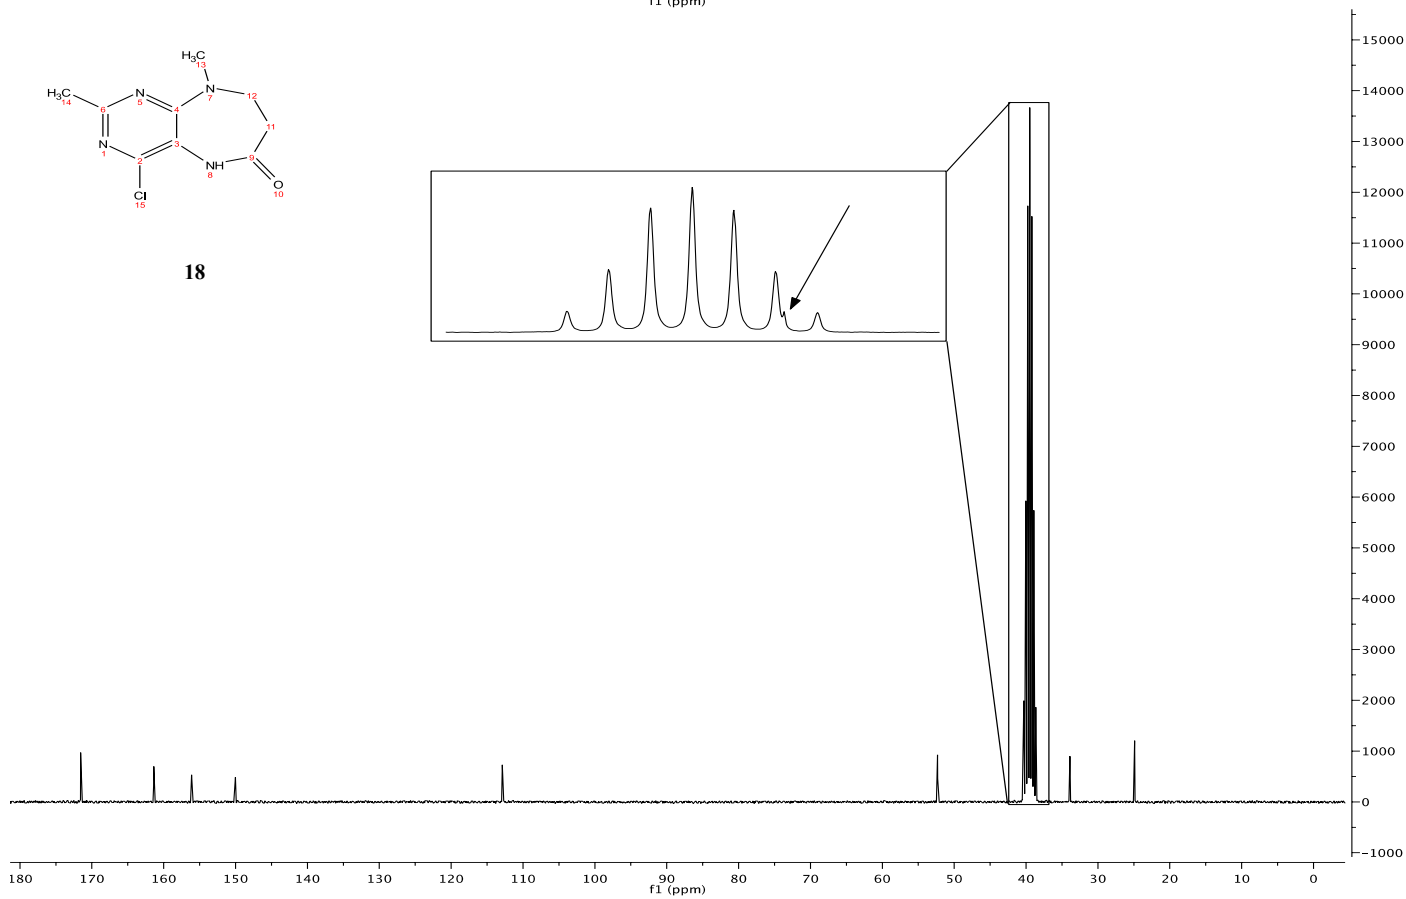

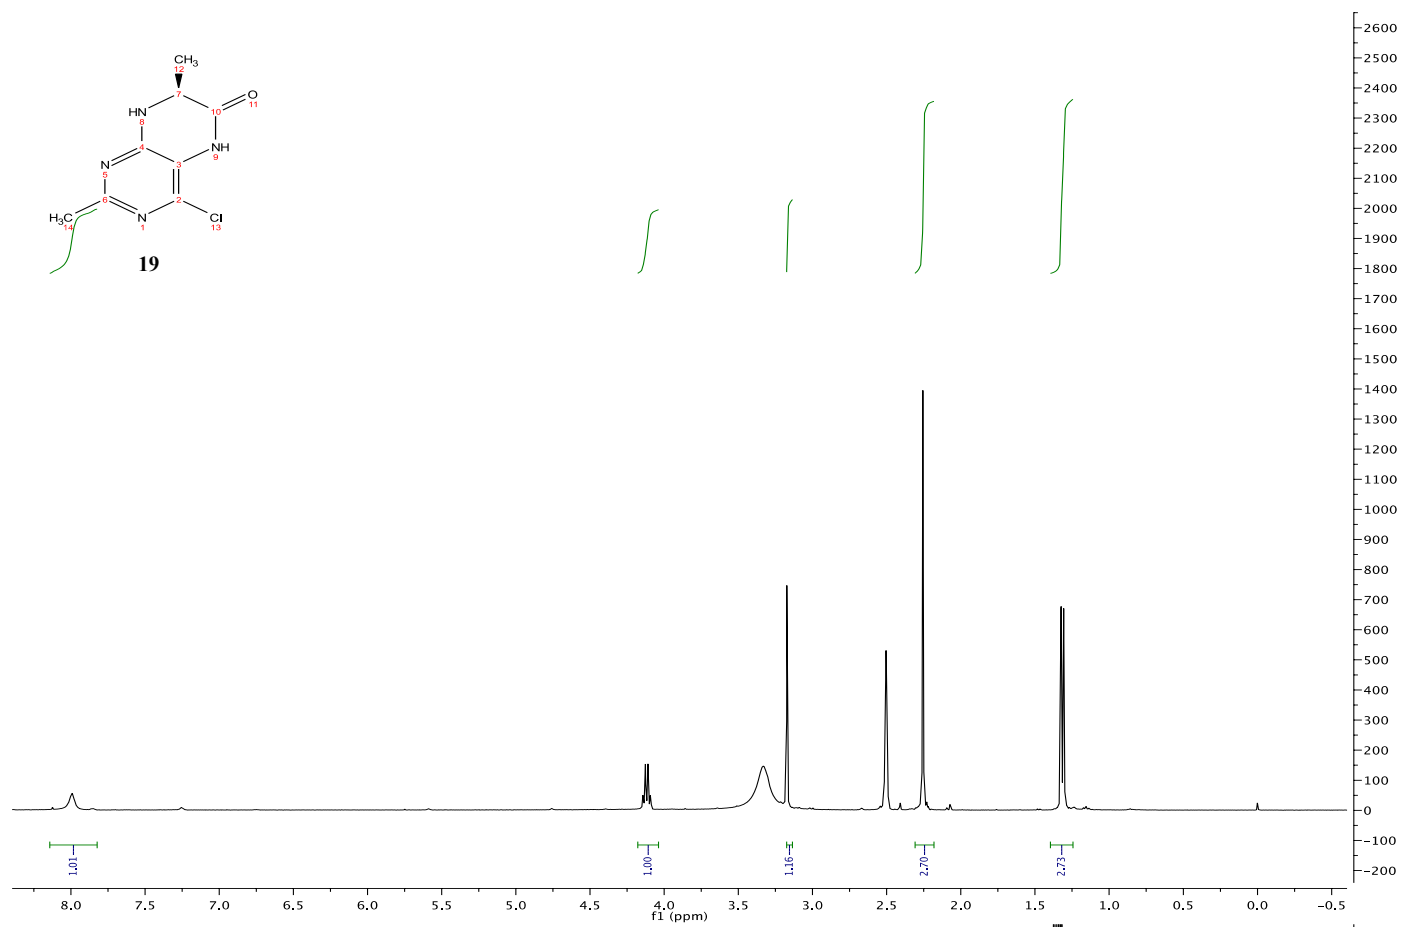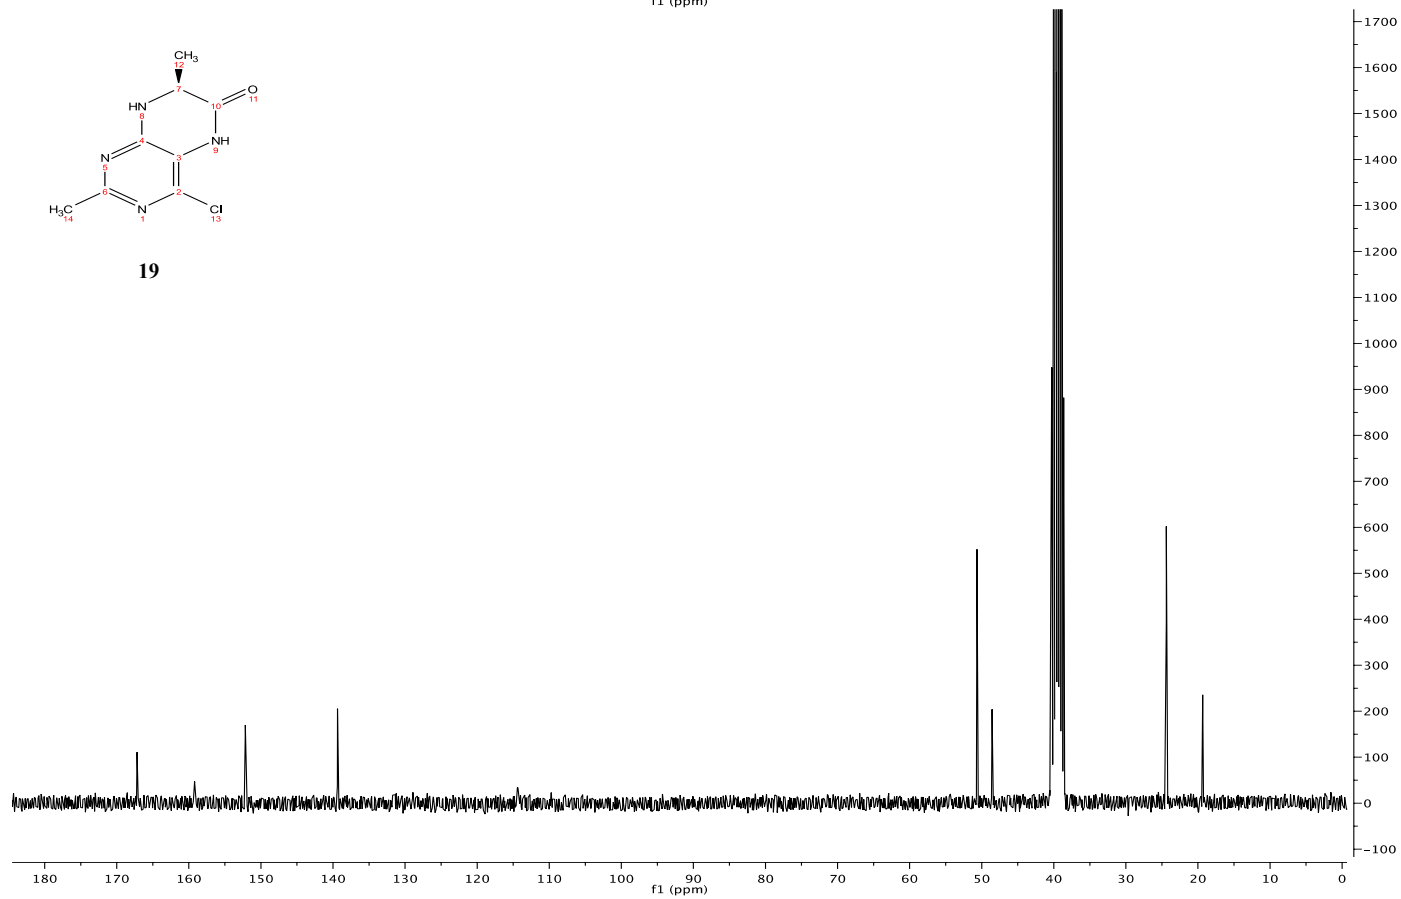





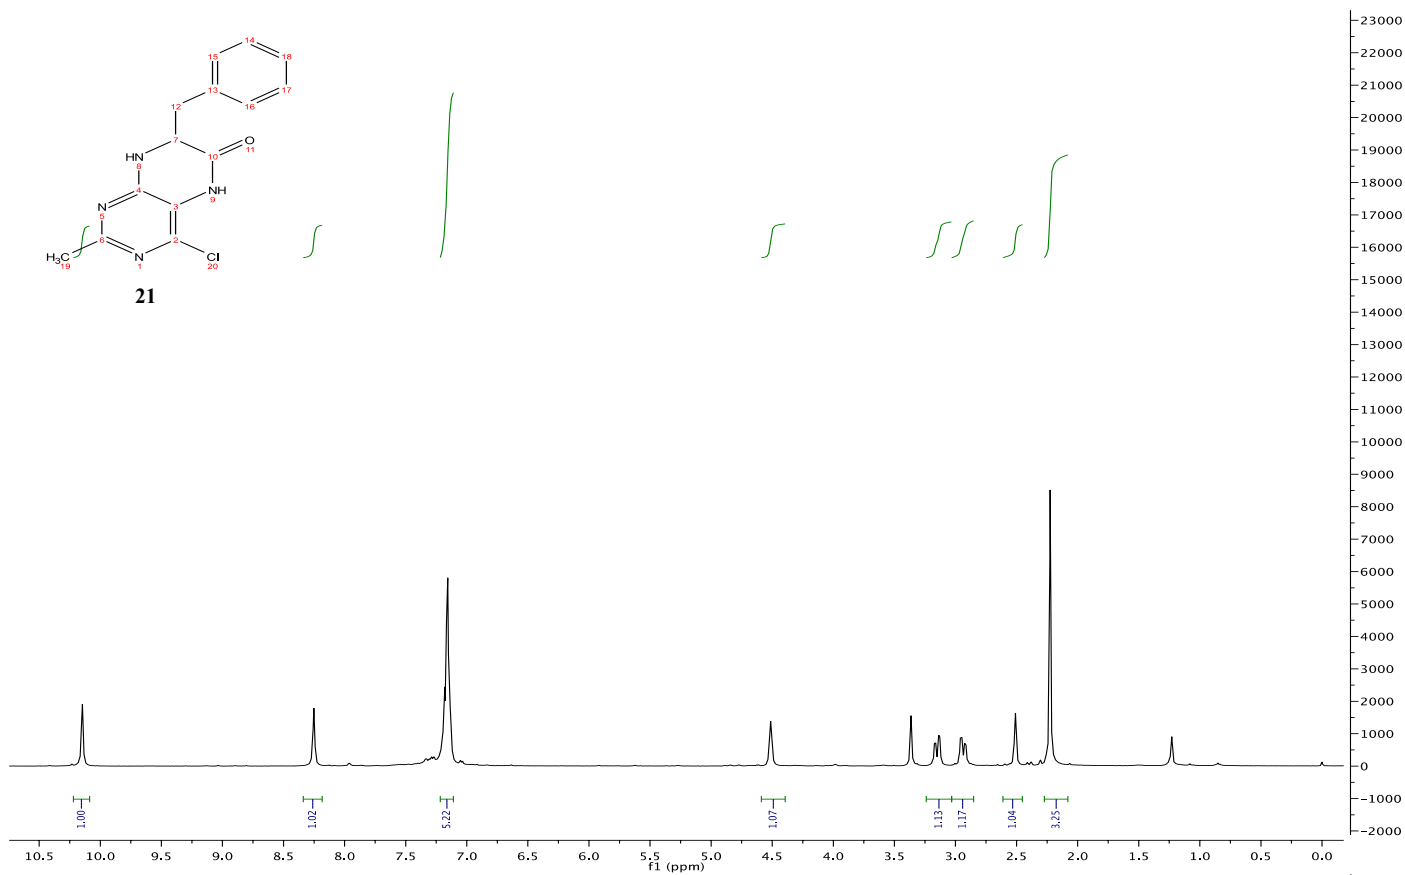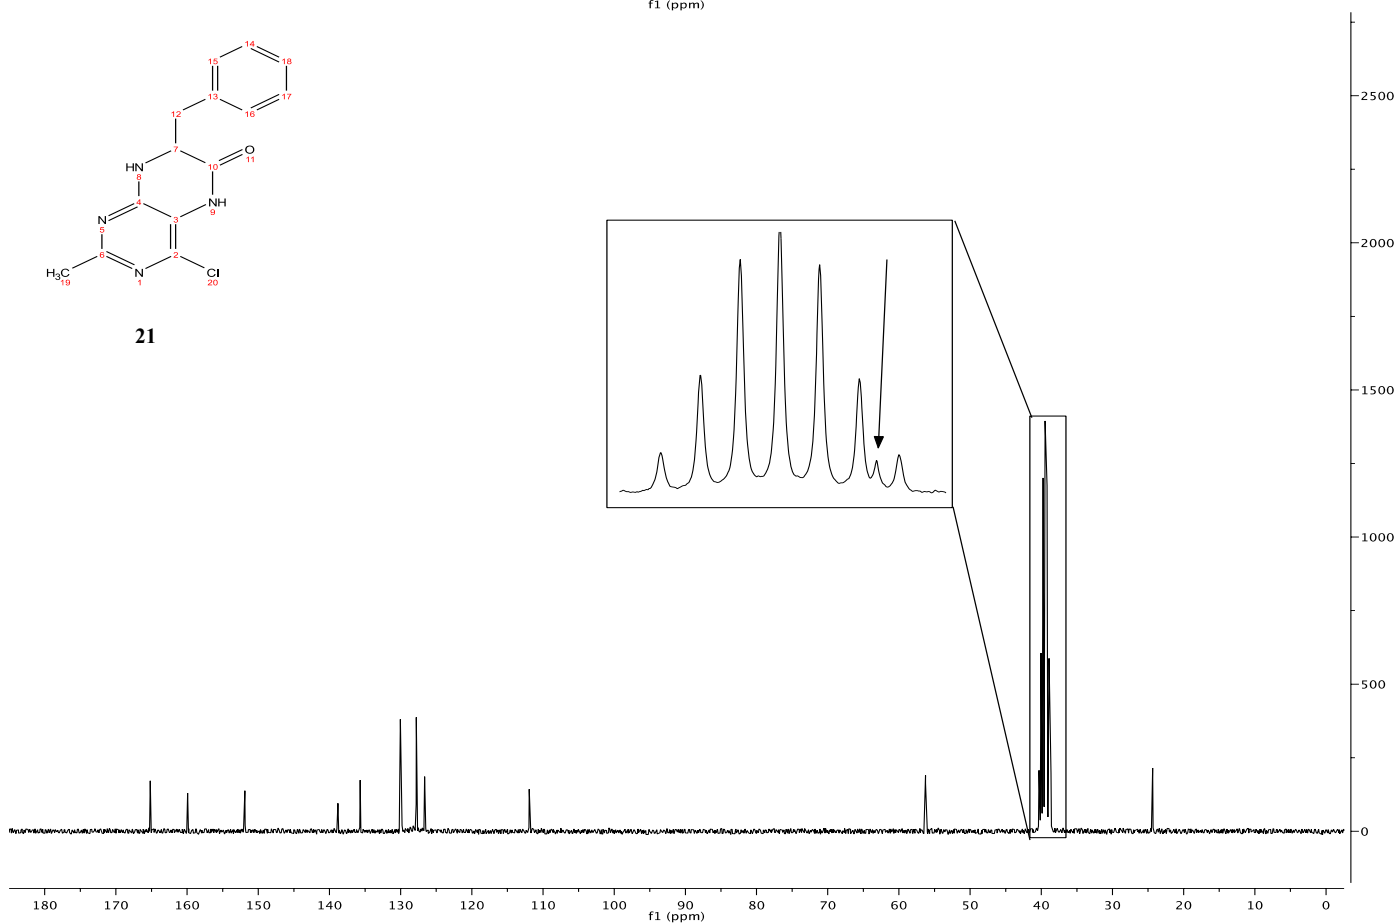

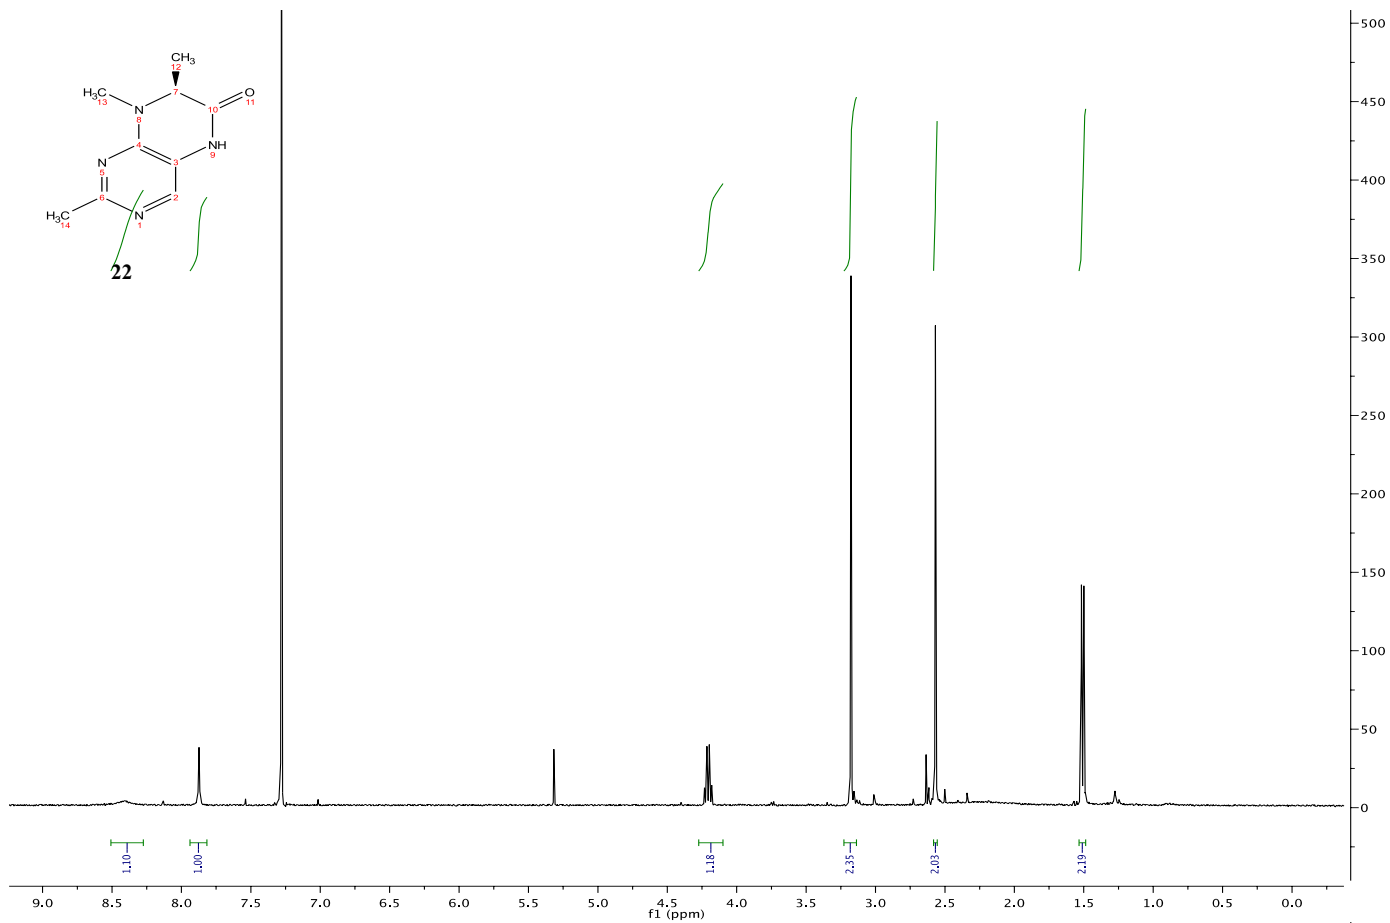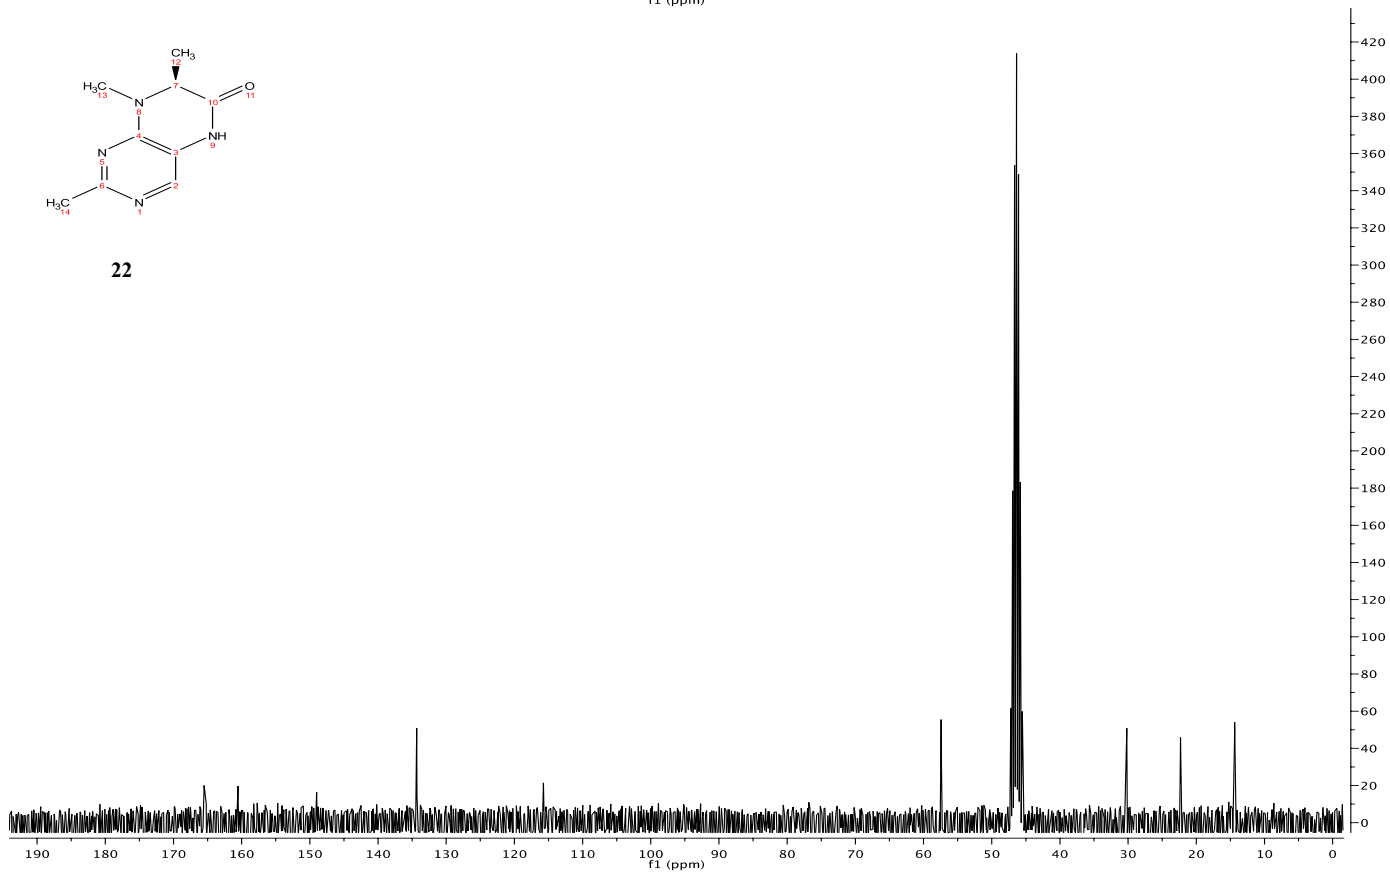

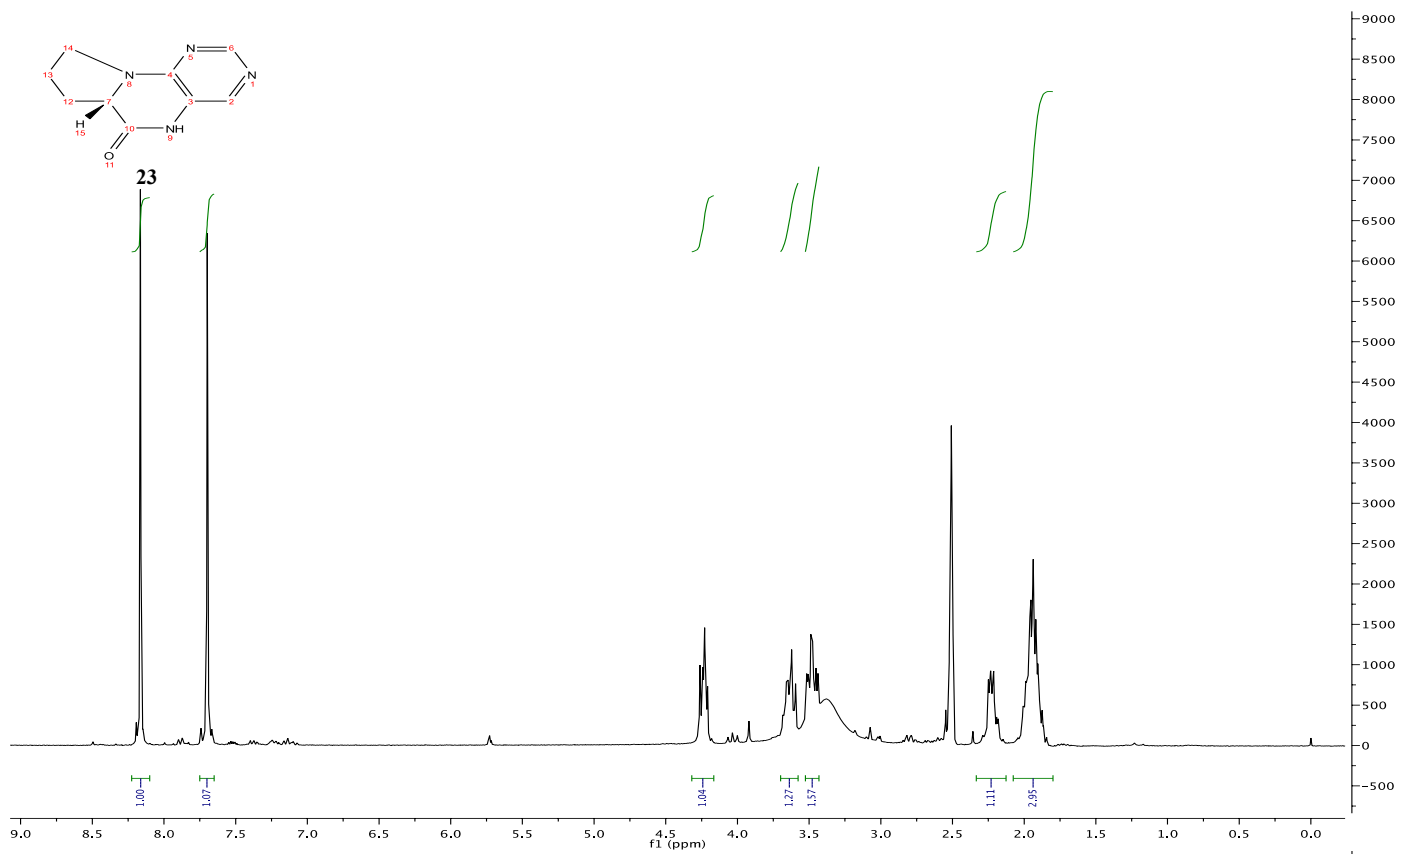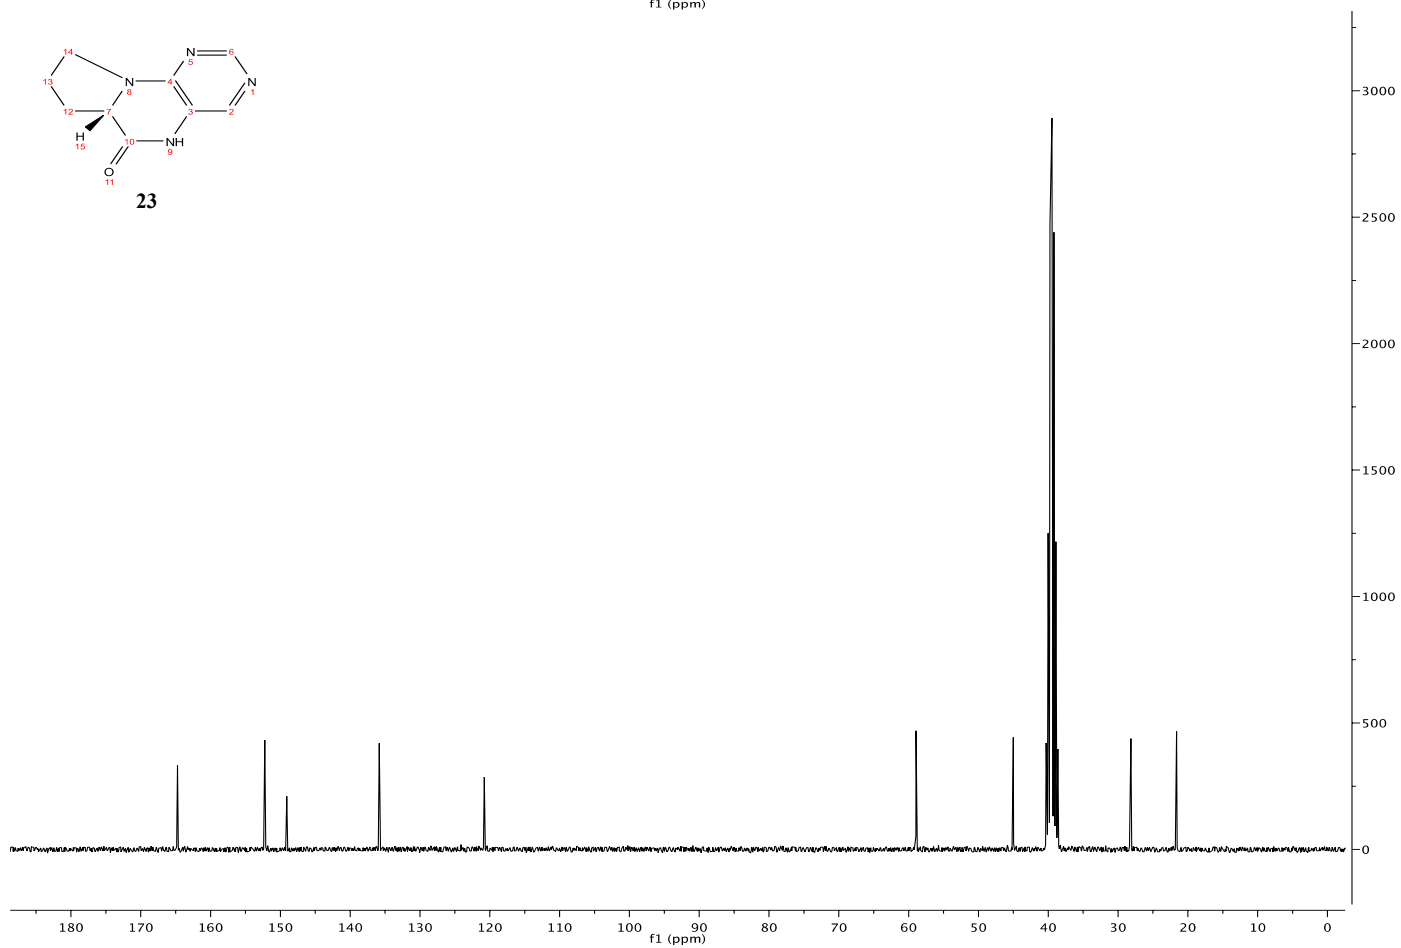

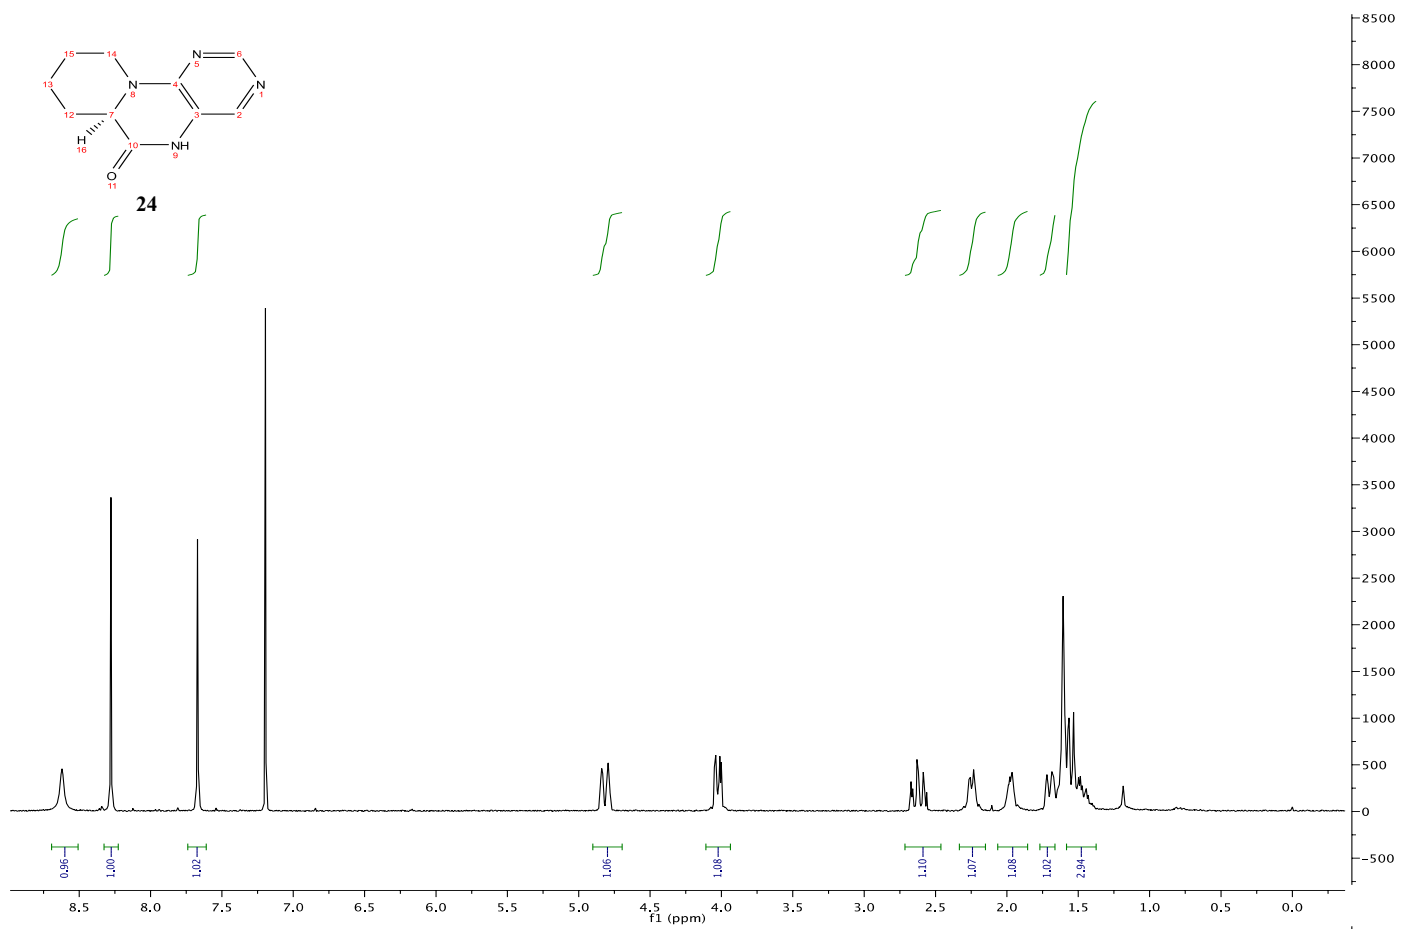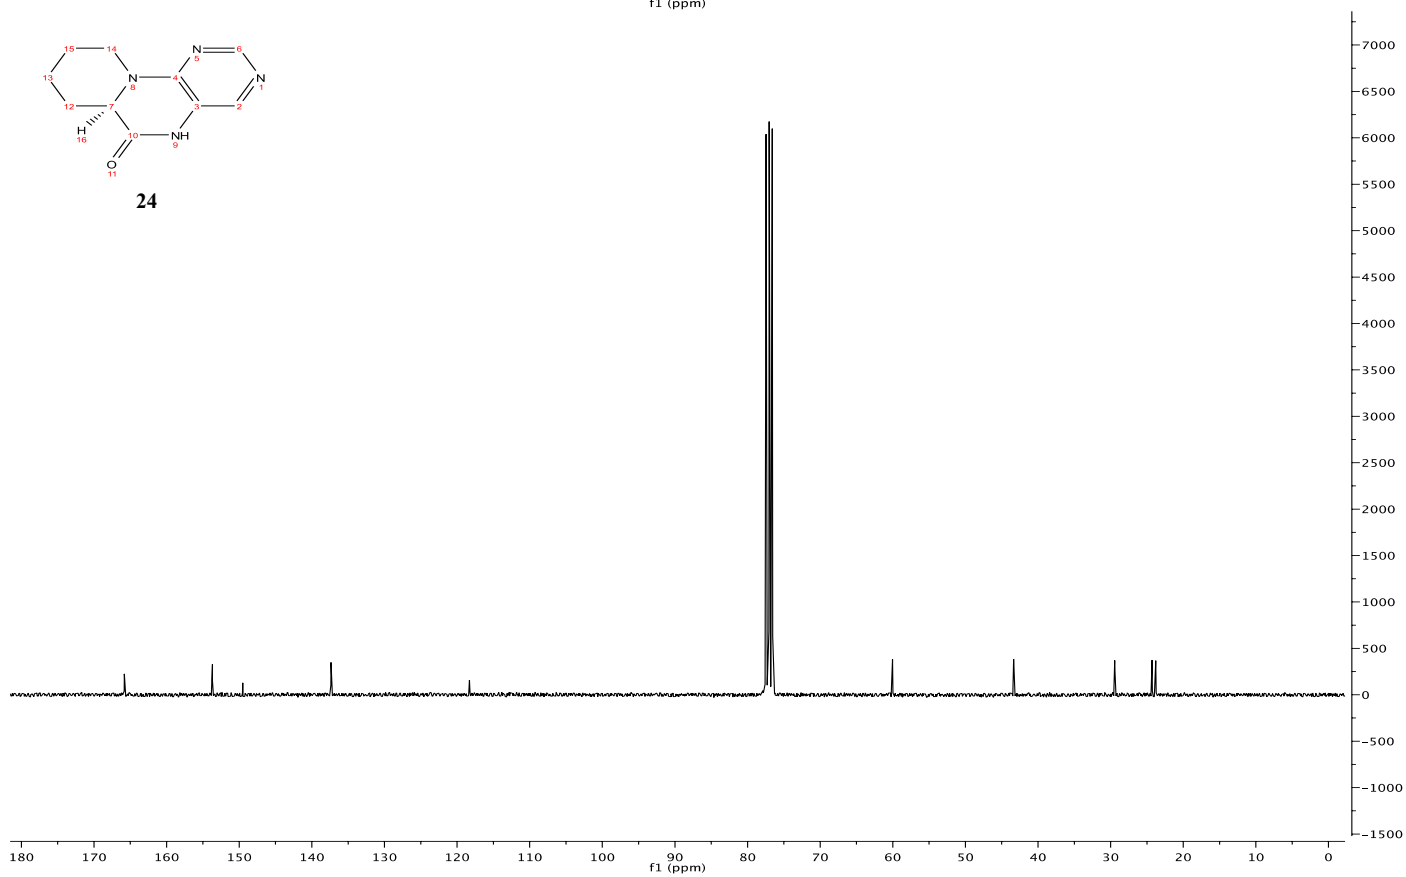

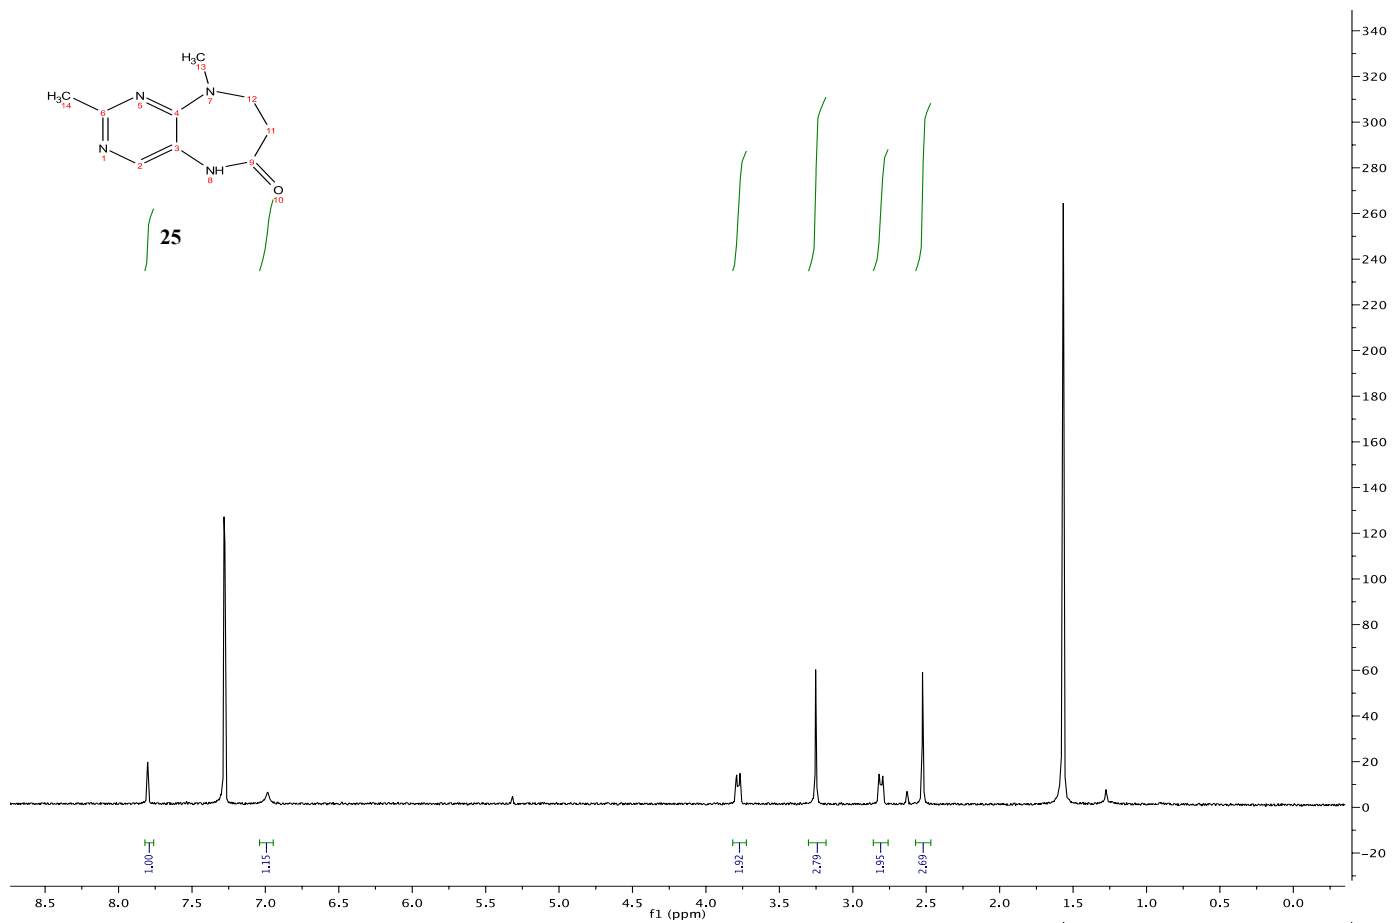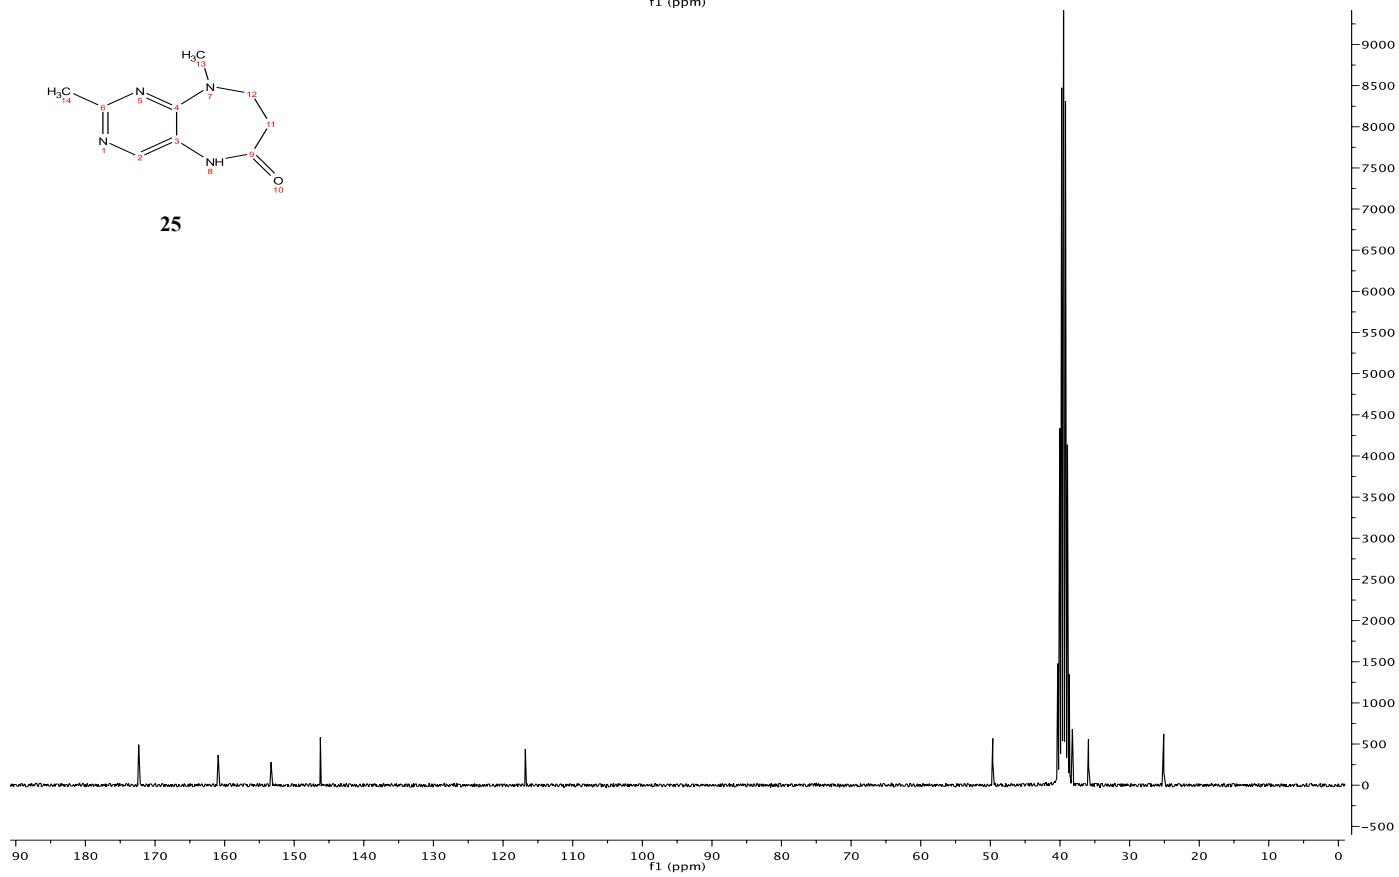

Supplement: c5ob01154j1.pdf [file c5ob01154j1.pdf]
